# Supplementary material for: Chronic Artificial Blue-Enriched White Light Is an Effective Countermeasure to Delayed Circadian Phase and Neurobehavioral Decrements
Source: PLOS journal article supplement (doi:10.1371/journal.pone.0102827), 2014-07-29
Supplement: S1 (10.1371/journal.pone.0102827.s001) [file journal.pone.0102827.s001]

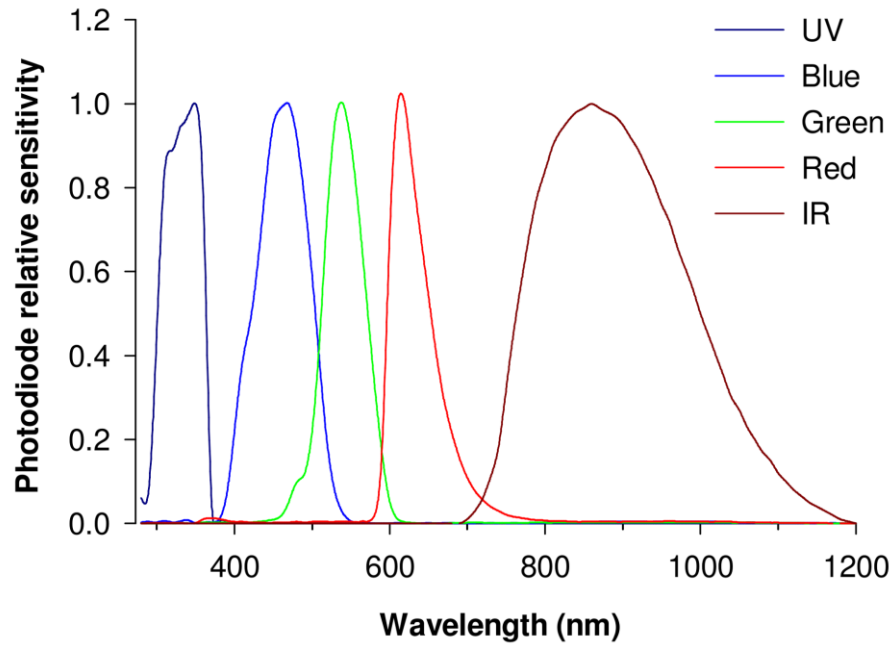

**Figure S1. Relative spectral sensitivity of the LightWatcher's photodiodes.** The device (Lighwatcher) contains 5 photodiodes with peak sensitivities around: IR (860 nm), red (620 nm), green (540 nm), blue (460 nm) and UV lights (350 nm). This device was used to monitor continuously individual spectral light exposure during the study.
